# Supplementary material for: Prevalence and Antimicrobial Resistance Profiles of Neisseria gonorrhoeae and Associated Factors among Women with Suspected STIs in Bahir Dar City, Northwest Ethiopia
Source: Research Square preprint supplement (doi:10.21203/rs.3.rs-7762542/v1), 2025-11-11
Supplement: Supplementary file 1 [file 3d70bcf47aabc9c020a22e36.docx]

**Table S4.** Sexual and Behavioral Characteristics and *N. gonorrhoeae* Prevalence among Women with Suspected STIs in Bahir Dar City, Northwest Ethiopia, February–May 2025

| **Variables** | **Frequency N (%)** | ***N.gonorrhoeae* infection** | |
| --- | --- | --- | --- |
|  |  | **Positive n (%)** | **Negative n (%)** |
| Number of life time sexual partner |  |  |  |
| 1 | 80(30.7) | 3(3.8) | 77(96.2) |
| 2-4 | 107(41) | 5(4.7) | 102(95.3) |
| 5-6 | 50(19.2) | 9(18.0) | 41(82) |
| >6 | 24(9.2) | 4(16.7) | 20(83.3) |
| Number of panty liner per day |  |  |  |
| 1-2 | 177(67.8) | 17(9.6) | 160(90.4) |
| 3-4 | 74(28.4) | 4(5.4%) | 70(94.6) |
| >4 | 10(3.8) | 0(0.0%) | 10(100) |
| Frequency of vaginal washing with water  per day |  |  |  |
| 2 times | 63(24.1) | 2(3.2) | 61(96.8) |
| 3 times | 16(6.1) | 5(31.2) | 11(68.8) |
| ≥4 times | 182(69.7) | 14(7.7) | 168(92.3) |
| Frequency of Condom use during sexual intercourse |  |  |  |
| Never use | 244(93.5) | 19(7.8) | 225(92.2) |
| sometimes(1-2 days per week) | 15(5.7) | 1(6.7) | 14(93.3) |
| Usually(3-6 days per week) | 1(.4) | 1(100) | 0(0.0) |
| Always (7 day per week ) | 1(.4) | 0(0.0) | 1(100) |
| Smoking status/habit |  |  |  |
| Never smoke | 247(94.6) | 20(8.1) | 227(91.9) |
| sometimes(1-2 days per week) | 6(2.3) | 0(0.0) | 6(100) |
| Usually(3-6 days per week) | 8(3.1) | 1(12.5) | 7(87.5) |
| Shish inhaling status |  |  |  |
| Yes | 3(1.1) | 3(100) | 0(0.0) |
| No | 258(98.9) | 18(7.0) | 240(93) |
| Chewing chat |  |  |  |
| Yes | 8(3.1) | 1(12.5) | 7(87.5) |
| No | 253(96.9) | 20(7.9) | 233(92.1) |
| Alcohol intake habit |  |  |  |
| Never drink | 242(92.7) | 20(8.3) | 222(91.7) |
| sometimes(1-2 days per week) | 29(.8) | 0(0.0) | 2(100) |
| Usually(3-6 days per week) | 17(6.5) | 1(5.9) | 16(94.1) |
