# Supplementary material for: Prevalence and Antimicrobial Resistance Profiles of Neisseria gonorrhoeae and Associated Factors among Women with Suspected STIs in Bahir Dar City, Northwest Ethiopia
Source: Research Square preprint supplement (doi:10.21203/rs.3.rs-7762542/v1), 2025-11-11
Supplement: Supplementary file 2 [file 6df18929413384063ae5f6a3.docx]

File 1. English Version of the Structured Questionnaire

**Title: Structured Questionnaire for Assessing the Prevalence and Antimicrobial Resistance Profiles of *Neisseria gonorrhoeae* and Associated Factors among Women with Suspected STIs in Bahir Dar City, Northwest Ethiopia**

**Study Period:** February–May 2025
**Study Site:** Selected Health Institutions, Bahir Dar City, and Northwest Ethiopia

# Section I: Socio-Demographic Characteristics

1. Age (years): ☐ 20–24 ☐ 25–29 ☐ 30–34 ☐ 35–39 ☐ 40–44 ☐ 45–49

2. Residence: ☐ Urban ☐ Rural

3. Marital status: ☐ Single ☐ Married ☐ Divorced ☐ Widowed

4. Educational level: ☐ Unable to read/write ☐ Primary school ☐ Secondary school ☐ Diploma ☐ Degree and above

5. Occupation: ☐ Civil servant ☐ Student ☐ Daily laborer ☐ Commercial sex worker ☐ Housewife ☐ Merchant ☐ Self-employed

6. Monthly income (ETB): ☐ <3000 ☐ 3000–5999 ☐ 6000–8999 ☐ 9000–14,999 ☐ ≥15,000

# Section II: Clinical Characteristics

1. Do you currently have vaginal discharge? ☐ Yes ☐ No

2. Do you feel pain during urination? ☐ Yes ☐ No

3. Do you have lower abdominal pain? ☐ Yes ☐ No

4. Do you experience pain during sexual intercourse? ☐ Yes ☐ No

5. Do you feel a vaginal burning sensation? ☐ Yes ☐ No

6. Do you have vaginal itching? ☐ Yes ☐ No

7. Have you ever been diagnosed with an STI? ☐ Yes ☐ No

8. Have you ever had an abortion? ☐ Yes ☐ No

9. Have you ever had a preterm birth? ☐ Yes ☐ No

10. Have you ever been told you have infertility? ☐ Yes ☐ No

11. Have you used any antibiotics without prescription in the past 3 months? ☐ Yes ☐ No

12. What is your HIV status? ☐ Positive ☐ Negative ☐ Unknown

13. Do you use family planning? ☐ Never ☐ Pills ☐ Injectable ☐ Other (specify) __________

14. Vaginal pH (measured using pH paper or stick):

☐ ≤ 4.5 ☐ > 4.5

15. Gram stain of cervical sample

☐ GNDC (Gram-negative diplococci)

☐ No GNDC

16. Nugent score for Bacterial Vaginosis (BV)

☐ Normal (0-3)

☐ Intermediate (4-6)

☐ BV (7-10)

17. Donders’ score for Aerobic Vaginitis (AV)

☐ Normal (0-2)

☐ Mild (3-4)

☐ Moderate (5-6)

☐ Severe (7-10)

# Section III: Sexual and Behavioral Characteristics

1. Number of lifetime sexual partners: ☐ 1 ☐ 2–4 ☐ 5–6 ☐ >6

2. How many panty liners do you use per day? ☐ 1–2 ☐ 3–4 ☐ >4

3. How often do you wash your vagina with water per day? ☐ 1 times ☐ 2 times ☐ 3 times ☐ ≥4 times

4. Frequency of condom use during sexual intercourse: ☐ Never ☐ Sometimes (1–2 days/week) ☐ Usually (3–6 days/week) ☐ Always (7 days/week)

5. Smoking habit: ☐ Never ☐ Sometimes (1–2 days/week) ☐ Usually (3–6 days/week)

6. Do you inhale shisha? ☐ Yes ☐ No

7. Do you chew khat? ☐ Yes ☐ No

8. Alcohol drinking habit: ☐ Never ☐ Sometimes (1–2 days/week) ☐ Usually (3–6 days/week)

End of Questionnaire
