# Supplementary material for: Prevalence and Antimicrobial Resistance Profiles of Neisseria gonorrhoeae and Associated Factors among Women with Suspected STIs in Bahir Dar City, Northwest Ethiopia
Source: Research Square preprint supplement (doi:10.21203/rs.3.rs-7762542/v1), 2025-11-11
Supplement: Supplementary file 3 [file 8d5e118f8466cb882cc5778c.docx]

**Table S3.** Clinical Characteristics and *N. gonorrhoeae* Prevalence among Women with Suspected STIs in Bahir Dar City, Northwest Ethiopia, February–May 2025

| **Variables** | **Frequency N (%)** | ***N.gonorrhoeae* infection** | |
| --- | --- | --- | --- |
| **Vaginal discharge** |  | **Positive n (%)** | **Negative n (%)** |
| Yes | 236(90.4) | 20(8.5) | 216(91.5) |
| No | 25(9.6) | 1(8.3) | 24(96.0) |
| Pain during urination |  |  |  |
| Yes | 254(97.3) | 21(8.3) | 233(91.7) |
| No | 7(2.7) | 0(0.0) | 7(100.0) |
| Lower abdominal pain |  |  |  |
| Yes | 194(74.3) | 17(8.8) | 177(91.2) |
| No | 67(25.7) | 4(6.0) | 63(94.0) |
| Pain During sexual intercourse |  |  |  |
| Yes | 201(77) | 15(7.5) | 186(92.5) |
| No | 60(23) | 6(10.0) | 54(90.0) |
| Vaginal burning sensation |  |  |  |
| Yes | 164(62.8) | 17(10.4) | 147(89.6) |
| No | 97(37.2) | 4(4.1) | 93(95.9) |
| Vaginal itching |  |  |  |
| Yes | 173(66.3) | 15(8.7) | 158(91.3) |
| No | 88(33.7) | 6(6.8) | 82(93.2) |
| History of STI infection |  |  |  |
| Yes | 97(37.2) | 6(6.2) | 91(93.8) |
| No | 164(62.8) | 15(9.1) | 149(90.9) |
| History of abortion |  |  |  |
| Yes | 83(31.8) | 9(10.8) | 74(89.2) |
| No | 178(68.2) | 12(6.7) | 166(93.3) |
| History of preterm birth |  |  |  |
| Yes | 18(6.9) | 0(0.0) | 18(100) |
| No | 243(93.1) | 21(100) | 222(91.4) |
| History of infertility diagnosis |  |  |  |
| Yes | 41(15.7) | 6(14.6) | 35(85.4) |
| No | 220(84.3) | 15(6.8) | 205(93.2) |
| History non prescribed antibiotic usage in the past three months |  |  |  |
| Yes | 237(90.8) | 21(8.9) | 216(91.1) |
| No | 24(9.2) | 0(0.0) | 24(100) |
| HIV status |  |  |  |
| Positive | 1(.4) | 0(0.0) | 1(100) |
| Negative | 260(99.6) | 21(8.1) | 239(91.90 |
| Usage of family planning |  |  |  |
| Never use | 4(1.5) | 1(25) | 3(75) |
| Pills | 74(28.4) | 3(4.1) | 71(95.9) |
| Injectable | 183(70.1) | 17(9.3) | 166(90.7) |
| Vaginal PH |  |  |  |
| ≤4.5 | 179(68.6) | 7(3.9) | 172(96.1) |
| >4.5 | 82(31.4) | 14(17) | 68(83) |
| Gram stain of cervical sample |  |  |  |
| GNDC | 27(10.3) | 17(63) | 10(37.0) |
| No GNDC | 234(89.7) | 4(1.7) | 230(98.3) |
| Nugent score result for BV |  |  |  |
| Normal(0-3) | 165(63.2) | 6(3.6) | 159(96.4) |
| Intermediate(4-6) | 42(16.1) | 3(7.1) | 39(92.9) |
| BV(7-10) | 54(20.7) | 12(22.2) | 42(77.8) |
| Doonde,s score result for AV |  |  |  |
| Normal(0-2) | 216(82.8) | 8(3.7) | 208(96.30 |
| mild (3-4) | 21(8.0) | 7(33.3) | 14(66.7) |
| Moderate(5-6) | 14(5.4) | 2(14.3) | 12(85.7) |
| Severe (7-10) | 10(3.8) | 4(40.0) | 6(60) |
