# Supplementary material for: Prevalence and Antimicrobial Resistance Profiles of Neisseria gonorrhoeae and Associated Factors among Women with Suspected STIs in Bahir Dar City, Northwest Ethiopia
Source: Research Square preprint supplement (doi:10.21203/rs.3.rs-7762542/v1), 2025-11-11
Supplement: Supplementary file 4 [file f91633dc3184eb350b541cf2.docx]

**Table S 2.** Socio-Demographic Characteristics and *N. gonorrhoeae* Prevalence among Women with Suspected STIs in Bahir Dar City, Northwest Ethiopia, February–May 2025

| **Variables** | **Frequency N (%)** | ***N.gonorrhoeae* infection** | |
| --- | --- | --- | --- |
| Age |  | Positive n (%) | Negative n (%) |
| 20-24 | 15(5.7) | 1(6.7) | 14(93.3) |
| 25 -29 | 89(34.1) | 11(12.4) | 78(87.6) |
| 30-34 | 68(26.1) | 3(4.4) | 65(95.6) |
| 35-39 | 34(13) | 4(11.8) | 30(88.2) |
| 40-44 | 45(17.2) | 1(2.2) | 44(97.8) |
| 45-49 | 10(3.8) | 1(10.0) | 9(90.0) |
| Residence |  |  |  |
| Rural | 66(25.3) | 6(9.1) | 60(90.9) |
| Urban | 195(74.7) | 15(7.7) | 180(92.3) |
| Marital status |  |  |  |
| Single | 38(14.6) | 3(7.9) | 35(92.1) |
| Married | 211(80.8) | 17(8.1) | 194(91.9) |
| Divorced | 7(2.7) | 0(0.0) | 7(100.0) |
| Widowed | 5(1.9 | 1(20.0) | 4(80.0) |
| Educational level |  |  |  |
| unable to read write | 3(1.1) | 1(33.3) | 2(66.7) |
| primary school | 55(21.1) | 1(1.8) | 54(98.2) |
| secondary school | 69(26.4) | 11(15.9) | 58(84.1) |
| Diploma | 59(22.6) | 4(6.8) | 55(93.2) |
| degree and above | 75(28.7) | 4(5.3) | 71(94.7) |
| Occupation |  |  |  |
| civil servant | 68(26.1) | 2(2.9) | 66(97.1) |
| Student | 6(2.3) | 1(16.7) | 5(83.3) |
| daily labor | 17(6.5) | 1(5.9) | 16(94.1) |
| commercial sex worker | 17(6.5) | 2(11.8) | 15(88.2) |
| house wife | 82(31.4) | 9(11.0) | 73(89.0) |
| Merchant | 20(7.7) | 2(10.0) | 18(90.0) |
| self employed | 51(19.5) | 4(7.8) | 47(92.2) |
| Monthly income |  |  |  |
| <3000 | 46(17.6) | 2(4.3) | 44(95.7) |
| 3000-5999 | 83(31.8) | 9(10.8) | 74(89.2) |
| 6000-8999 | 83(31.8) | 5(6.0) | 78(94.0) |
| 9000-14999 | 43(16.5) | 4(9.3) | 39(90.7) |
| >15000 | 6(2.3) | 1(16.7) | 5(83.3% |
